# Supplementary material for: Blood-feeding Patterns of Amazonian Forest Edge Mosquitoes
Source: Research Square preprint supplement (doi:10.21203/rs.3.rs-9717303/v1), 2026-06-11
Supplement: Supplementary file 1 [file 42e973df32af7c71b60c8fd0.xlsx]

## Sheet: Table S1
Table S1: Primers used in this study
primer_name	direction	sequence (5'-3')	reference_doi
COI_long	forward	AACCACAAAGACATTGGCAC	10.1111/j.1365-2915.2008.00760.x
COI_long	reverse	AAGAATCAGAATARGTGTTG	10.1111/j.1365-2915.2008.00760.x
COI_short	forward	GCAGGAACAGGWTGAACCG	10.1111/j.1365-2915.2008.00760.x
COI_short	reverse	AATCAGAAYAGGTGTTGGTATAG	10.1111/j.1365-2915.2008.00760.x

## Sheet: Table S2
Table S2: References used for each taxon to generate consensus sequences.
GenBank_access_number	species	gene/region
HQ918413	Alouatta macconnelli	cytochrome c oxidase subunit I (COI)
MN787075.1	Callithrix sp.	cytochrome c oxidase subunit I (COI)
JN801544.1	Cathartes aura	cytochrome c oxidase subunit I (COI)
JF459152.1	Dasyprocta leporina	cytochrome c oxidase subunit I (COI)
KJ446318.1	Homo sapiens	cytochrome c oxidase subunit I (COI)
KF771221	Nasua nasua	cytochrome c oxidase subunit I (COI)
JF459286.1	Pecari tajacu	cytochrome c oxidase subunit I (COI)
GU737553	Tapirus kabomani	cytochrome c oxidase subunit I (COI)

## Sheet: Table S3
Table S3: Provides the complete dataset generated and analyzed in this study, including mosquito species, collection sites, blood-feeding data, and sequence information.
id	mosquitoe_species	date_collected	site_edge	site_longitude	site_latitude	results	blood_meal_source	identity_NCBI (%)	identity_BOLD (%)	GenBank_access_number
BM01	Psorophora amazonica	2021-05-20	continuous	-2.92601	-59.9525	successful	Homo sapiens	100	100	PZ148398
BM02	Psorophora amazonica	2021-05-25	treefall	-2.92465	-59.9658	successful	Homo sapiens	99.85	99.85	PZ148399
BM03	Haemagogus janthinomys	2021-06-01	continuous	-2.94168	-59.9781	successful	Homo sapiens	99.85	99.85	PZ148400
BM04	Psorophora amazonica	2021-09-16	rural	-2.92299	-59.9812	successful	Homo sapiens	99.85	99.85	PZ148401
BM05	Haemagogus janthinomys	2021-10-15	treefall	-2.92438	-59.971	successful	Homo sapiens	99.85	99.85	PZ148402
BM06	Psorophora amazonica	2021-11-04	continuous	-2.94168	-59.9781	successful	Homo sapiens	99.85	99.85	PZ148403
BM07	Psorophora amazonica	2021-12-07	treefall	-2.92465	-59.9658	successful	Homo sapiens	99.85	99.85	PZ148404
BM08	Culex coronator	2021-12-14	urban	-3.00674	-59.9641	successful	Dasyprocta leporina	99.70	99.85	PZ148405
BM09	Psorophora amazonica	2022-01-12	treefall	-2.92465	-59.9658	successful	Homo sapiens	99.85	99.85	PZ148406
BM10	Psorophora amazonica	2022-01-13	continuous	-2.94168	-58.9781	successful	Homo sapiens	99.85	99.85	PZ148407
BM11	Psorophora amazonica	2022-01-13	continuous	-2.94168	-57.9781	successful	Homo sapiens	99.85	99.85	PZ148408
BM12	Psorophora albigenu	2022-01-18	rural	-2.9173	-59.9744	successful	Homo sapiens	99.85	99.85	PZ148409
BM13	Psorophora amazonica	2022-01-18	rural	-2.9173	-59.9744	successful	Homo sapiens	99.85	99.85	PZ148410
BM14	Psorophora amazonica	2022-01-19	continuous	-2.92574	-59.958	successful	Dicotyles tajacu	99.85	99.85	PZ148411
BM15	Psorophora amazonica	2022-01-19	continuous	-2.92574	-59.958	successful	Dasyprocta leporina	99.85	99.85	PZ148412
BM16	Psorophora amazonica	2022-01-19	continuous	-2.92574	-59.958	successful	Homo sapiens	99.85	99.85	PZ148413
BM17	Psorophora amazonica	2022-01-19	continuous	-2.92574	-59.958	successful	Homo sapiens	99.85	99.85	PZ148414
BM18	Culex coronator	2022-02-16	continuous	-2.92549	-59.9661	successful	Homo sapiens	97.28	99.03	PZ148415
BM19	Psorophora amazonica	2022-02-23	treefall	-2.93468	-59.9755	successful	Homo sapiens	99.81	100	PZ148416
BM20	Psorophora amazonica	2022-02-24	continuous	-2.92601	-59.9524	successful	Homo sapiens	100	100	PZ148417
BM21	Psorophora albigenu	2022-03-04	urban	-3.00597	-59.9693	successful	Cathartes aura	99.11	99.53	PZ148418
BM22	Psorophora amazonica	2022-03-08	rural	-2.9173	-59.9744	successful	Homo sapiens	99.85	99.85	PZ148419
BM23	Psorophora amazonica	2022-03-10	treefall	-2.92465	-59.9658	successful	Homo sapiens	99.85	99.85	PZ148420
BM24	Psorophora amazonica	2022-03-10	treefall	-2.92465	-59.9658	successful	Tapirus sp.	98.40	99.35	PZ148421
BM25	Psorophora amazonica	2022-03-15	treefall	-2.92299	-59.9812	successful	Homo sapiens	99.85	99.85	PZ148422
BM26	Psorophora amazonica	2022-03-15	rural	-2.92299	-59.9812	failed
BM27	Psorophora albigenu	2022-03-15	rural	-2.92299	-59.9812	successful	Homo sapiens	99.85	99.85	PZ148423
BM28	Psorophora albigenu	2022-03-15	rural	-2.92299	-59.9812	failed
BM29	Psorophora amazonica	2022-03-15	rural	-2.92299	-59.9812	failed
BM30	Psorophora amazonica	2022-03-15	rural	-2.92299	-59.9812	successful	Homo sapiens	99.85	99.85	PZ148424
BM31	Psorophora amazonica	2022-03-15	rural	-2.92299	-59.9812	successful	Homo sapiens	99.85	99.85	PZ148425
BM32	Psorophora albigenu	2022-03-15	rural	-2.92299	-59.9812	successful	Homo sapiens	99.85	99.85	PZ148426
BM33	Psorophora amazonica	2022-03-16	treefall	-2.92438	-59.971	successful	Homo sapiens	99.85	99.85	PZ148427
BM34	Psorophora amazonica	2022-03-16	treefall	-2.92438	-59.971	successful	Homo sapiens	99.85	99.85	PZ148428
BM35	Psorophora amazonica	2022-03-16	treefall	-2.92438	-59.971	successful	Homo sapiens	99.85	99.85	PZ148429
BM36	Psorophora amazonica	2022-03-16	treefall	-2.92438	-59.971	successful	Homo sapiens	99.70	99.85	PZ148430
BM37	Psorophora amazonica	2022-03-16	treefall	-2.92438	-59.971	successful	Homo sapiens	99.85	99.85	PZ148431
BM38	Psorophora amazonica	2022-03-16	treefall	-2.92438	-59.971	failed
BM39	Psorophora amazonica	2022-03-16	treefall	-2.92438	-59.971	successful	Homo sapiens	99.85	99.85	PZ148432
BM40	Psorophora amazonica	2022-03-16	treefall	-2.92438	-59.971	successful	Homo sapiens	99.85	99.85	PZ148433
BM41	Psorophora amazonica	2022-03-16	treefall	-2.92438	-59.971	successful	Homo sapiens	99.85	99.85	PZ148434
BM42	Psorophora amazonica	2022-03-16	treefall	-2.92438	-59.971	successful	Homo sapiens	99.85	99.85	PZ148435
BM43	Psorophora amazonica	2022-03-16	treefall	-2.92438	-59.971	successful	Homo sapiens	99.85	99.85	PZ148436
BM44	Psorophora amazonica	2022-03-16	treefall	-2.92438	-59.971	successful	Nasua nasua	94.61	94.61	PZ148437
BM45	Psorophora amazonica	2022-03-16	treefall	-2.92438	-59.971	successful	Homo sapiens	99.85	99.85	PZ148438
BM46	Psorophora amazonica	2022-03-16	treefall	-2.92438	-59.971	successful	Homo sapiens	99.85	99.85	PZ148439
BM47	Psorophora amazonica	2022-03-16	treefall	-2.92438	-59.971	successful	Homo sapiens	99.85	99.85	PZ148440
BM48	Haemagogus janthinomys	2022-03-16	treefall	-2.92438	-59.971	successful	Homo sapiens	99.85	99.85	PZ148441
BM49	Psorophora amazonica	2022-03-17	treefall	-2.93468	-59.9755	successful	Homo sapiens	99.85	99.85	PZ148442
BM50	Psorophora amazonica	2022-03-17	treefall	-2.93468	-59.9755	successful	Homo sapiens	99.85	99.85	PZ148443
BM51	Psorophora amazonica	2022-03-17	treefall	-2.93468	-59.9755	successful	Alouatta sp.	99.85	99.85	PZ148444
BM52	Psorophora amazonica	2022-03-17	treefall	-2.93468	-59.9755	failed
BM53	Psorophora amazonica	2022-03-17	treefall	-2.93468	-59.9755	failed
BM54	Psorophora amazonica	2022-03-17	treefall	-2.93468	-59.9755	failed
BM55	Psorophora amazonica	2022-03-17	treefall	-2.93468	-59.9755	failed
BM56	Psorophora amazonica	2022-03-17	treefall	-2.93468	-59.9755	failed
BM57	Psorophora amazonica	2022-03-17	treefall	-2.93468	-59.9755	successful	Homo sapiens	99.85	99.85	PZ148445
BM58	Psorophora amazonica	2022-03-17	treefall	-2.93468	-59.9755	failed
BM59	Psorophora amazonica	2022-03-17	treefall	-2.93468	-59.9755	failed
BM60	Psorophora amazonica	2022-03-17	treefall	-2.93468	-59.9755	failed
BM61	Psorophora amazonica	2022-03-17	treefall	-2.93468	-59.9755	successful	Homo sapiens	100	100	PZ148446
BM62	Psorophora amazonica	2022-03-17	treefall	-2.93468	-59.9755	failed
BM63	Psorophora amazonica	2022-03-17	treefall	-2.93468	-59.9755	failed
BM64	Psorophora amazonica	2022-03-17	treefall	-2.93468	-59.9755	failed
BM65	Psorophora amazonica	2022-03-17	treefall	-2.93468	-59.9755	failed
BM66	Psorophora amazonica	2022-03-17	treefall	-2.93468	-59.9755	successful	Callithrix sp.	94.77	99.67	PZ148447
BM67	Psorophora amazonica	2022-03-17	treefall	-2.93468	-59.9755	failed
BM68	Psorophora amazonica	2022-03-17	treefall	-2.93468	-59.9755	failed
BM69	Psorophora circumflava	2022-03-25	continuous	-2.94168	-59.9781	successful	Homo sapiens	99.85	99.85	PZ148448
BM70	Psorophora albigenu	2022-03-25	continuous	-2.94168	-59.9781	successful	Homo sapiens	99.34	99.85	PZ148449
BM71	Psorophora amazonica	2022-03-25	continuous	-2.94168	-59.9781	successful	Homo sapiens	99.85	99.85	PZ148450
BM72	Psorophora albigenu	2022-03-25	continuous	-2.94168	-59.9781	successful	Homo sapiens	99.85	100	PZ148451
BM73	Psorophora amazonica	2022-03-25	continuous	-2.94168	-59.9781	successful	Homo sapiens	99.85	99.85	PZ148452
BM74	Psorophora amazonica	2022-03-25	continuous	-2.94168	-59.9781	successful	Homo sapiens	99.56	99.85	PZ148453
BM75	Psorophora amazonica	2022-03-25	continuous	-2.94168	-59.9781	successful	Homo sapiens	99.85	99.85	PZ148454
BM76	Psorophora albigenu	2022-03-25	continuous	-2.92574	-59.958	successful	Homo sapiens	99.85	99.85	PZ148455
BM77	Psorophora amazonica	2022-03-29	urban	-3.00597	-59.9693	failed
BM78	Psorophora amazonica	2022-03-30	continuous	-2.92601	-59.9524	successful	Homo sapiens	99.85	100	PZ148456
BM79	Haemagogus janthinomys	2022-03-30	continuous	-2.92601	-59.9524	failed
BM80	Haemagogus janthinomys	2022-03-30	continuous	-2.92601	-59.9524	failed
BM81	Haemagogus janthinomys	2022-03-30	continuous	-2.92601	-59.9524	failed
BM82	Psorophora amazonica	2022-03-31	urban	-3.00674	-59.9641	successful	Homo sapiens	100	100	PZ148457
BM83	Aedes albopictus	2022-03-31	urban	-3.00674	-3.00674	successful	Homo sapiens	99.85	99.85	PZ148458
BM84	Psorophora amazonica	2022-04-06	rural	-2.92299	-59.9812	successful	Homo sapiens	99.85	99.85	PZ148459
BM85	Psorophora amazonica	2022-04-07	rural	-2.9173	-59.9744	successful	Homo sapiens	99.85	99.85	PZ148460
BM86	Haemagogus janthinomys	2022-04-07	rural	-2.9173	-59.9744	successful	Homo sapiens	99.85	99.85	PZ148461
BM87	Psorophora amazonica	2022-04-07	rural	-2.9173	-59.9744	successful	Homo sapiens	99.85	99.85	PZ148462
BM88	Sabethes batesi	2022-04-11	treefall	-2.93468	-59.9755	successful	Homo sapiens	99.85	99.85	PZ148463
BM89	Psorophora amazonica	2022-04-18	treefall	-2.92438	-59.971	successful	Homo sapiens	99.85	99.85	PZ148464
BM90	Psorophora amazonica	2022-04-18	treefall	-2.92438	-59.971	successful	Homo sapiens	100	100	PZ148465
BM91	Psorophora amazonica	2022-04-18	treefall	-2.92438	-59.971	successful	Homo sapiens	99.85	99.85	PZ148466
BM92	Psorophora amazonica	2022-04-18	treefall	-2.92438	-59.971	successful	Homo sapiens	100	100	PZ148467
BM93	Psorophora amazonica	2022-04-18	treefall	-2.92438	-59.971	successful	Homo sapiens	99.85	99.85	PZ148468
BM94	Psorophora amazonica	2022-04-18	treefall	-2.92438	-59.971	failed
BM95	Psorophora amazonica	2022-04-18	treefall	-2.92438	-59.971	successful	Homo sapiens	99.85	99.85	PZ148469
BM96	Psorophora amazonica	2022-04-18	treefall	-2.92438	-59.971	successful	Homo sapiens	99.85	99.85	PZ148470
BM97	Psorophora amazonica	2022-04-18	treefall	-2.92438	-59.971	successful	Homo sapiens	99.85	99.85	PZ148471
BM98	Psorophora amazonica	2022-04-18	treefall	-2.92438	-59.971	successful	Homo sapiens	99.85	99.85	PZ148472
BM99	Psorophora amazonica	2022-04-18	treefall	-2.92438	-59.971	successful	Homo sapiens	99.85	99.85	PZ148473
BM100	Psorophora albipes	2022-04-18	treefall	-2.92438	-59.971	successful	Homo sapiens	99.85	99.85	PZ148474
BM101	Psorophora amazonica	2022-04-18	treefall	-2.92438	-59.971	failed
BM102	Psorophora amazonica	2022-04-18	treefall	-2.92438	-59.971	successful	Homo sapiens	99.70	99.85	PZ148475
BM103	Psorophora amazonica	2022-04-18	treefall	-2.92438	-59.971	successful	Homo sapiens	99.70	99.85	PZ148476
BM104	Psorophora amazonica	2022-04-18	treefall	-2.92438	-59.971	successful	Homo sapiens	99.70	99.85	PZ148477
BM105	Psorophora amazonica	2022-04-28	continuous	-2.92574	-59.958	successful	Homo sapiens	99.85	99.85	PZ148478
BM106	Psorophora amazonica	2022-05-04	treefall	-2.93468	-59.9755	failed
BM107	Psorophora amazonica	2022-05-04	treefall	-2.93468	-59.9755	successful	Homo sapiens	99.70	99.70	PZ148479
BM108	Psorophora amazonica	2022-05-04	treefall	-2.93468	-59.9755	successful	Homo sapiens	99.85	99.85	PZ148480
BM109	Psorophora amazonica	2022-05-04	treefall	-2.93468	-59.9755	successful	Homo sapiens	99.85	100	PZ148481
BM110	Psorophora amazonica	2022-05-04	treefall	-2.93468	-59.9755	successful	Homo sapiens	99.85	99.85	PZ148482
BM111	Psorophora amazonica	2022-05-04	treefall	-2.93468	-59.9755	successful	Homo sapiens	99.85	99.85	PZ148483
BM112	Psorophora amazonica	2022-05-04	treefall	-2.93468	-59.9755	successful	Homo sapiens	99.70	99.85	PZ148484
BM113	Psorophora amazonica	2022-05-04	treefall	-2.93468	-59.9755	successful	Homo sapiens	99.85	99.85	PZ148485
BM114	Psorophora amazonica	2022-05-11	rural	-2.9173	-59.9744	successful	Dicotayles tajacu	99.85	99.85	PZ148486
BM115	Psorophora amazonica	2022-05-11	rural	-2.9173	-59.9744	successful	Homo sapiens	93.99	99.85	PZ148487
BM116	Psorophora amazonica	2022-05-11	rural	-2.9173	-59.9744	successful	Homo sapiens	99.85	99.85	PZ148488
BM117	Psorophora amazonica	2022-05-12	treefall	-2.92438	-59.971	successful	Dicotyles tajacu	99.54	99.54	PZ148489
BM118	Psorophora amazonica	2022-05-12	treefall	-2.92438	-59.971	successful	Dicotyles tajacu	99.54	99.85	PZ148490
BM119	Psorophora amazonica	2022-05-12	treefall	-2.92438	-59.971	successful	Dicotyles tajacu	99.54	99.70	PZ148491
BM120	Psorophora amazonica	2022-05-12	treefall	-2.92438	-59.971	successful	Homo sapiens	99.85	100	PZ148492
BM121	Haemagogus janthinomys	2022-05-12	treefall	-2.92438	-59.971	successful	Homo sapiens	99.85	100	PZ148493
BM122	Psorophora amazonica	2022-05-12	treefall	-2.92438	-59.971	successful	Dicotyles tajacu	99.54	99.70	PZ148494
BM123	Psorophora amazonica	2022-05-24	continuous	-2.92601	-59.9524	successful	Homo sapiens	99.70	99.85	PZ148495
BM124	Psorophora amazonica	2022-05-25	continuous	-2.94168	-59.9781	successful	Homo sapiens	99.85	99.85	PZ148496
BM125	Psorophora amazonica	2022-05-25	continuous	-2.94168	-59.9781	successful	Homo sapiens	99.70	99.85	PZ148497
BM126	Psorophora amazonica	2022-05-25	continuous	-2.94168	-59.9781	failed
BM127	Psorophora amazonica	2022-05-25	continuous	-2.94168	-59.9781	failed
BM128	Psorophora amazonica	2022-05-25	continuous	-2.94168	-59.9781	successful	Homo sapiens	99.85	100	PZ148498
BM129	Psorophora amazonica	2022-05-25	continuous	-2.94168	-59.9781	successful	Homo sapiens	99.85	100	PZ148499
BM130	Psorophora amazonica	2022-05-26	continuous	-2.92574	-59.958	successful	Homo sapiens	99.85	99.85	PZ148500
BM131	Psorophora amazonica	2022-05-26	continuous	-2.92574	-59.958	successful	Homo sapiens	99.85	99.85	PZ148501
BM132	Psorophora amazonica	2022-05-26	continuous	-2.92574	-59.958	successful	Homo sapiens	99.85	99.85	PZ148502
BM133	Psorophora amazonica	2022-05-26	continuous	-2.92574	-59.958	successful	Homo sapiens	99.85	99.85	PZ148503
BM134	Psorophora amazonica	2022-05-26	continuous	-2.92574	-59.958	successful	Homo sapiens	99.85	99.85	PZ148504
BM135	Psorophora amazonica	2022-05-26	continuous	-2.92574	-59.958	failed
BM136	Psorophora amazonica	2022-05-26	continuous	-2.92574	-59.958	failed
BM137	Psorophora amazonica	2022-05-26	continuous	-2.92574	-59.958	successful	Homo sapiens	99.85	99.85	PZ148505
BM138	Psorophora amazonica	2022-05-26	continuous	-2.92574	-59.958	successful	Homo sapiens	99.85	99.85	PZ148506
BM139	Haemagogus baresi	2022-06-14	continuous	-2.92601	-59.9524	successful	Homo sapiens	99.85	99.85	PZ148507
BM140	Sabethes chloropterus	2022-06-14	continuous	-2.92601	-59.9524	failed
BM141	Psorophora amazonica	2022-06-22	treefall	-2.92438	-59.971	successful	Homo sapiens	99.85	99.85	PZ148508
